# Supplementary material
Source: PubMed Central journal article supplement (PMC3773805)
Supplement: 1314540110_pnas.201314540SI.pdf [file 1314540110_pnas.201314540SI.pdf]

# Supporting Information

Li et al. 10.1073/pnas.1314540110

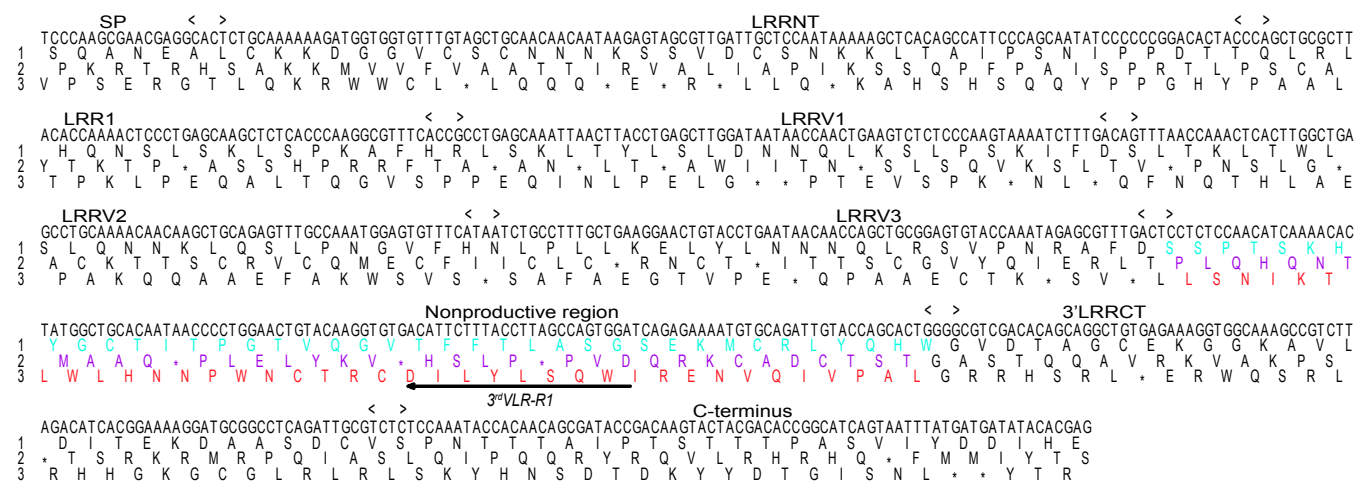

**Fig. S1.** Hypothetical translation of the hagfish EST clone (GenBank accession no. BAI66885) in three open reading frames (ORF). ORF1 of this clone encoded a nonproductive VLR-like protein lacking a connecting peptide (CP) and intact leucine-rich repeat C-terminal (LRRCT) motif. ORF1 (cyan) and ORF2 (purple) in the nonproductive region do not encode a characteristic CP-5'LRRCT motif, whereas the corresponding region in ORF3 (red) codes for a unique CP-5'LRRCT module. Arrowed line indicates the reverse primer region used for 5'-RACE.

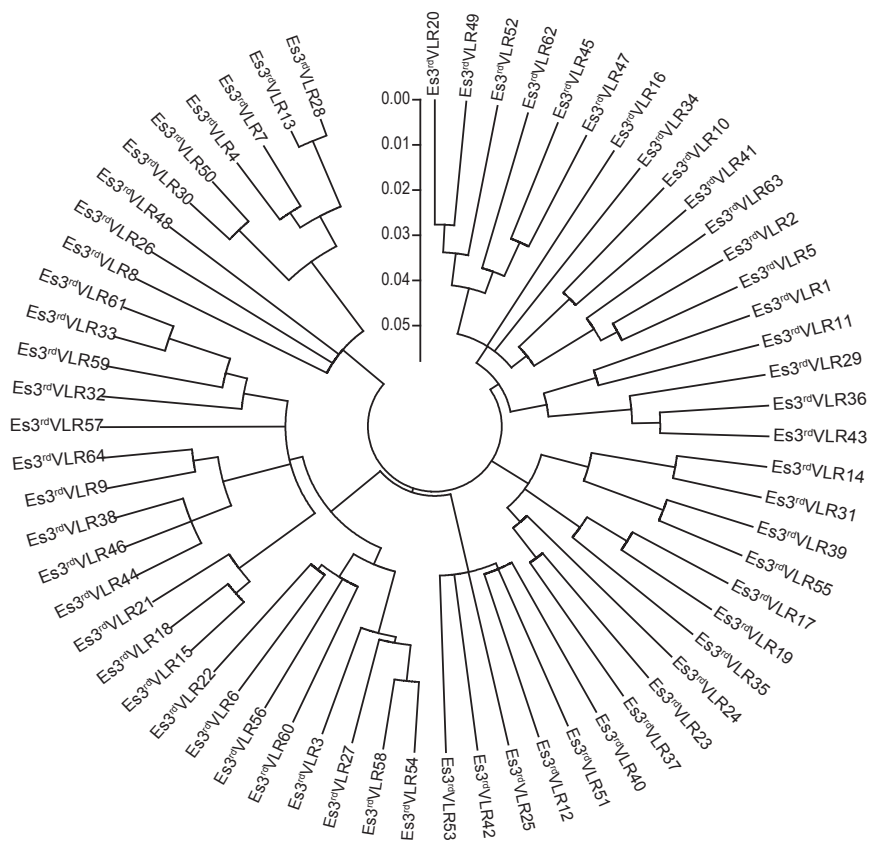

**Fig. S2.** Diversity of hagfish 3<sup>rd</sup>VLRs. This neighbor-joining tree was constructed using the diversity region from leucine-rich repeat N-terminal (LRRNT) to LRRCT of 64 mature sequences (GenBank accession nos. KF314046–KF314109).

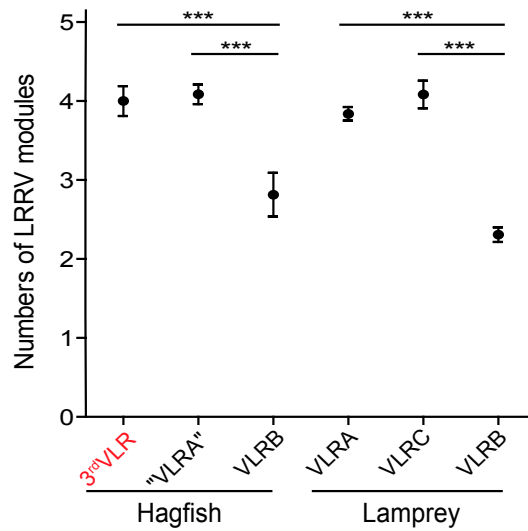

**Fig. S3.** Numbers of variable leucine-rich repeat (LRRV) modules in the different VLRs. Black circles represent average number of LRRV modules in the indicated VLRs. Bars indicate 95% confidence interval. cDNA clones analyzed: hagfish 3<sup>rd</sup>VLR ( $n = 64$ ), hagfish "VLRA" ( $n = 139$ ) (1), hagfish VLRB ( $n = 70$ ) (1), lamprey VLRA ( $n = 192$ ) (2), lamprey VLRC ( $n = 60$ ) (3) and lamprey VLRB ( $n = 517$ ) (4).

1. Pancer Z, et al. (2005) Variable lymphocyte receptors in hagfish. *Proc Natl Acad Sci USA* 102(26):9224–9229.
2. Rogozin IB, et al. (2007) Evolution and diversification of lamprey antigen receptors: Evidence for involvement of an AID-APOBEC family cytosine deaminase. *Nat Immunol* 8(6):647–656.
3. Das S, et al. (2013) Organization of lamprey variable lymphocyte receptor C locus and repertoire development. *Proc Natl Acad Sci USA* 110(15):6043–6048.
4. Alder MN, et al. (2005) Diversity and function of adaptive immune receptors in a jawless vertebrate. *Science* 310(5756):1970–1973.

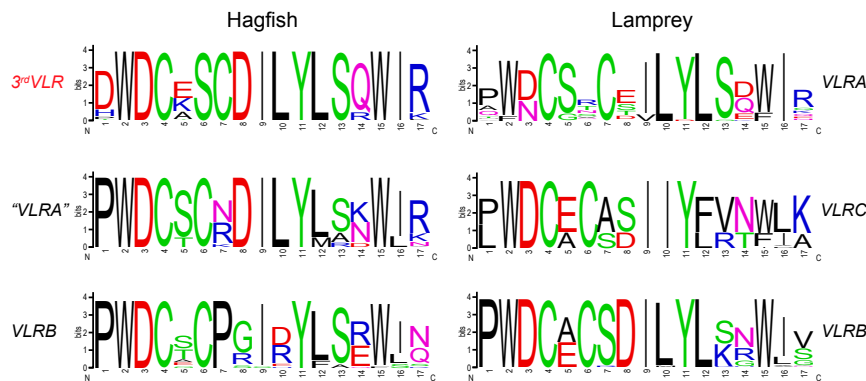

**Fig. S4.** Sequence signatures for the LRRCT portion of all known VLRs. Consensus sequences were generated by using the 17 amino acid residues from the N-terminal of LRRCT.

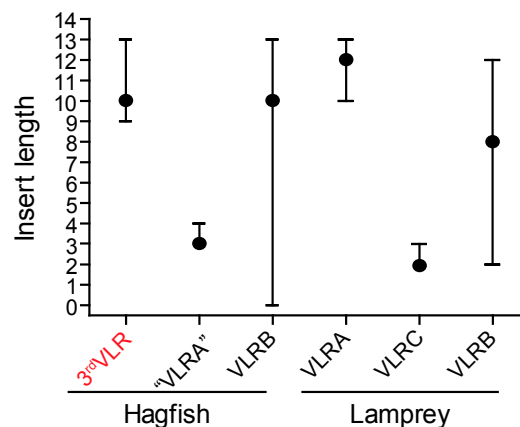

**Fig. S5.** Variable lengths of the LRRCT insert regions. Black circles represent median length of the indicated VLRs. Lines indicate range of insert length.

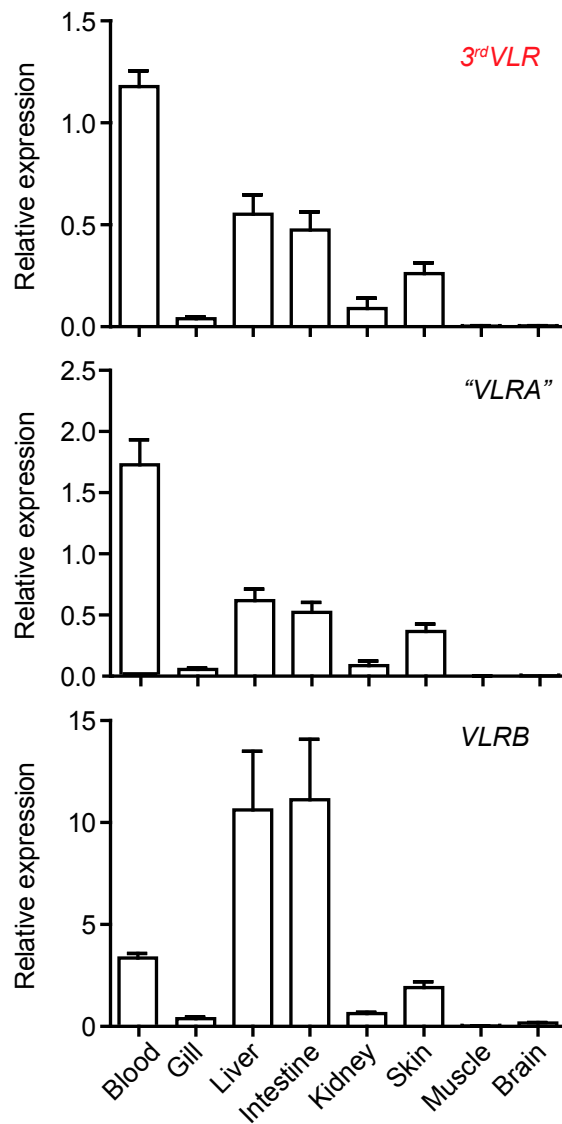

Fig. S6. Analysis of  $3^{\text{rd}}\text{VLR}$ , "VLRA", and VLRB expression by cells in different tissues. Transcripts were analyzed by real-time RT-PCR with GAPDH as control. Bars indicate SE of mean (SEM);  $n = 3$ .

Table S1. PCR primers

| Primer name                     | Primer sequence (5'→3')   |
|---------------------------------|---------------------------|
| $3^{\text{rd}}\text{VLR-R1}$    | TCCACTGGCTAAGGTAAGAATGTC  |
| $3^{\text{rd}}\text{VLR-SF}$    | ATGGAACGATGGTTCAGCAG      |
| $3^{\text{rd}}\text{VLRstop-R}$ | TTATGGTTTTCGGAACAACACAC   |
| QEs"VLRA" F                     | GATACCAAGAGCCAGACCATC     |
| QEs"VLRA" R                     | GTGGATGACGTACAAAATGGC     |
| QEsVLRBF                        | TACTTTCCCTTCGTACATCTTCCTC |
| QEsVLRBR                        | AGGCGTGACATACGAGGTAA      |
| QEs $3^{\text{rd}}\text{VLR}$ F | GAGCTTTTCTCAAAGGCATCG     |
| QEs $3^{\text{rd}}\text{VLR}$ R | GGAATCTCCGTAAAAATGTGAATC  |
| QEsGAPDHF                       | GATCACAGTATTCCAGGAGCG     |
| QEsGAPDHR                       | AGAGATGACTACCCGTTTTTC     |
